# Supplementary material for: Circulating small extracellular vesicle RNA profiling for the detection of T1a stage colorectal cancer and precancerous advanced adenoma
Source: eLife. 2024 Aug 9;12:RP88675. doi: 10.7554/eLife.88675 (PMC11315448; doi:10.7554/eLife.88675)
Supplement: Supplementary file 13. [file elife-88675-supp13.docx]

**Supplementary File 20. Transcripts and sequence of their primers and** [**probe**](javascript:;)**s.**

| RNA | primer | sequence | Length (bp) |
| --- | --- | --- | --- |
| *miR-3615* | RT-primer | GTCGTATCCAGTGCAGGGTCCGAGGTATTCGCACTGGATACGACGAGCCG | 21 |
| Forward | CCTCTCTCGGCTCCTCG |
| Probe | TCGCACTGGATACGACGAGCCG |
| *miR-425-5p* | RT-primer | GTCGTATCCAGTGCAGGGTCCGAGGTATTCGCACTGGATACGACTCAACG | 23 |
| Forward | CGCAATGACACGATCACTCC |
| Probe | TTCGCACTGGATACGACTCAACG |
| *miR-106b-3p* | RT-primer | GTCGTATCCAGTGCAGGGTCCGAGGTATTCGCACTGGATACGACGCTGC | 22 |
| Forward | CACCGCACTGTGGGTACT |
| Probe | ATTCGCACTGGATACGACGCTGC |
| *Let-7f-5p* | RT-primer | GTCGTATCCAGTGCAGGGTCCGAGGTATTCGCACTGGATACGACGGAAAG | 22 |
| Forward | AGCGCCTATACAGTCTACTGT |
| Probe | TCGCACTGGATACGACGGAAAGAC |
| *miR-320a-3p* | RT-primer | GTCGTATCCAGTGCAGGGTCCGAGGTATTCGCACTGGATACGACGGAAAG | 22 |
| Forward | AGCGCCTATACAGTCTACTGT |
| Probe | TCGCACTGGATACGACGGAAAGAC |
| *C19orf43* | Forward | GCAGAAGGAAACCGAGATGC | 155 |
| Reverse | GAGGAAGACAGAAAGAGCCAGAG |
| Probe | TCCCGCAGCCGTGGACGATTCT |
| *TOP1* | Forward | CTGTAGCCCTGTACTTCATCGAC | 150 |
| Reverse | TCTACCACATATTCCTGACCATCC |
| Probe | CCTTCCTCCTTTTCATTGCCTGCTCT |
| *PPDPF* | Forward | CGCCTGGGTTCCACTTCCA | 171 |
| Reverse | CTCTGCGGACTCCAACACC |
| Probe | AAAAGAAGCTGGCCCACCAATGACCC |
| *MT-ND2* | Forward | GTATTTCCTCACGCAAGCAACC | 144 |
| Reverse | CTTGGGTAACCTCTGGGACTC |
| Probe | ACCGCATCCATA+AT+C+CTT+CTAATAGC |
| *HIST2H2AA4* | Forward | CATCATCCCTCGTCACCTCCA | 160 |
| Reverse | TCACTTGCCCTTTGCCTTGTG |
| Probe | CCATCCGCAACGACGAGGAACTGAAC |
| *lnc-MSI1-2:1* | Forward | TGCCAATGCCGACTATATTTCAAG | 110 |
| Reverse | GCAGTATCGTAGCCAATGAGGTTT |
| Probe | CTTTTCCCAATACCCCGCCATGACGA |
| *lnc-MKRN2-42:1* | Forward | TCCGCACTAAGTTCGGCATC | 107 |
| Reverse | TTTTGACCTGCTCTGTTTCCG |
| Probe | TCCTTAGGCAACCTGGTGGTCCC |
| *LNC-EV-9572* | Forward | ATCCACCTGCCTCAGCCTTC | 117 |
| Reverse | TCCCAAGATGGAATCAGGAAGAG |
| Probe | TCACTGAGGCTGACCTGGCAAACTT |

+ suggested a location modified with locked nucleic acid (LNA)
